# 1 Kawasaki Disease patient stratification and pathway 2 analysis based on host transcriptomic and proteomic 3 profiles

4 Heather Jackson\*<sup>1</sup>, Stephanie Menikou\*<sup>1</sup>, Shea Hamilton<sup>1</sup>, Andrew McArdle<sup>1</sup>, Chisato Shimizu<sup>2</sup>,  
5 Rachel Galassini<sup>1</sup>, Honglei Huang<sup>3</sup>, Jihoon Kim<sup>2</sup>, Adriana Tremoulet<sup>2</sup>, Marien de Jonge<sup>4</sup>, Taco  
6 Kuijpers<sup>5</sup>, Victoria Wright<sup>1</sup>, Jane Burns<sup>2</sup>, Climent Casals-Pascual<sup>6</sup>, Jethro Herberg<sup>1</sup>, Mike Levin<sup>#1</sup>,  
7 Myrsini Kaforou<sup>#1</sup> and on behalf of the PERFORM consortium

8 <sup>1</sup> Faculty of Medicine, Imperial College London, London, SW7 2AZ

9 <sup>2</sup> Health Sciences, University of California San Diego, La Jolla, CA 92093

10 <sup>3</sup> Oxford Biomedica (UK) Ltd, Oxford, OX4 6LT

11 <sup>4</sup> Radboud University Medical Center, Nijmegen, 6525

12 <sup>5</sup> Amsterdam University Medical Center (AMC), Amsterdam, 1105

13 <sup>6</sup> Wellcome Trust Centre for Human Genetics, University of Oxford, Oxford, OX3 7BN

14 Correspondence: m.kaforou@imperial.ac.uk

## 15 **Abstract:**

16 The aetiology of Kawasaki Disease (KD), an acute inflammatory disorder of childhood, remains  
17 unknown despite various triggers of KD having been proposed. Host 'omic profiles offer insights  
18 into the host response to infection and inflammation, with the interrogation of multiple 'omic  
19 levels in parallel providing a more comprehensive picture. We used differential abundance  
20 analysis, pathway analysis, clustering and classification techniques to explore whether the host  
21 response in KD is more similar to the response to bacterial or viral infection at the transcriptomic  
22 and proteomic levels through comparison of 'omic profiles from children with KD to those with  
23 bacterial and viral infections. Pathways activated in patients with KD included those involved in  
24 anti-viral and anti-bacterial responses. Unsupervised clustering showed that the majority of KD  
25 patients clustered with bacterial patients on both 'omic levels, whilst application of diagnostic  
26 signatures specific for bacterial and viral infections revealed that many transcriptomic KD samples  
27 had low probabilities of having bacterial or viral infections, suggesting that KD may be triggered  
28 by a different process not typical of either common bacterial or viral infections. Clustering based  
29 on the transcriptomic and proteomic responses during KD revealed three clusters of KD patients  
30 on both 'omic levels, suggesting heterogeneity within the inflammatory response during KD. The  
31 observed heterogeneity may reflect differences in the host response to a common trigger, or  
32 variation dependent on different triggers of the condition.

33 **Keywords:** infectious diseases; paediatrics; transcriptomics; proteomics; Kawasaki Disease; host  
34 'omics; systems biology; pathway analysis; clustering; classification

---

## 36 **1. Introduction**

37 Kawasaki disease (KD) is an acute inflammatory disorder first described in Japan over 50 years  
38 ago [1]. KD occurs most frequently in children under five years of age [2]. Untreated KD leads to the  
39 formation of coronary artery aneurysms (CAAs) in 10-30% of children [3-5], causing it to be the most  
40 common cause of acquired heart disease in children in Europe, Japan and North America [6].

41 The aetiology of KD remains unknown, however the seasonality and epidemicity seen in areas  
42 of high incidence, including Japan, suggest that it is caused by an infectious trigger [7]. The current  
43 consensus is that, in some genetically predisposed children, an infectious trigger initiates an  
44 abnormal immune response [8,9]. Multiple viral and bacterial pathogens have been suggested as  
45 candidates for the trigger, in addition to airborne environmental and fungal triggers [8,10]. Despite

46 the many theories postulated, none have been independently confirmed, and some studies have  
47 concluded that KD is likely to be caused by multiple environmental triggers [11].

48 As the coronavirus disease 2019 (COVID-19) pandemic evolved in early to mid-2020, an increase  
49 in cases of children with unusual febrile illnesses, some with features resembling KD, was observed  
50 [12]. This new condition, which was later termed “Paediatric Inflammatory Multisystem Syndrome  
51 Temporally associated with SARS-CoV-2”, or “Multisystem Inflammatory Syndrome in Children”  
52 (PIMS-TS or MIS-C) [12–15], tends to arise several weeks after SARS-CoV-2 infection [14]. The finding  
53 of increased KD-like cases after the emergence of a novel viral pathogen raises questions about  
54 whether more than one type of trigger might cause KD, and whether KD might represent a  
55 constellation of overlapping inflammatory syndromes.

56 Study of host transcriptomic and proteomic profiles can reveal perturbations caused by infection  
57 or inflammation. Comparison of the transcriptional response in different diseases has revealed  
58 different host responses to individual pathogens such as TB, bacterial and viral infections [16,17].  
59 Previous studies of host ‘omics in the context of KD have characterised the pathways involved in the  
60 disease and have established biomarker signatures with diagnostic potential [18,19]. Interrogating  
61 multiple ‘omic datasets in parallel provides more accurate insights into the molecular dynamics of  
62 infection as information captured in one ‘omic layer might not necessarily be captured in another  
63 ‘omic layer.

64 We explored the host transcriptomic and proteomic profiles of children with KD and those with  
65 viral and bacterial infections, aiming to elucidate whether the inflammatory response in KD is more  
66 similar to that of a bacterial or viral infection, or indeed neither. We also used the approach to explore  
67 the heterogeneity within the transcriptional and translational response of patients with KD.

## 68 2. Results

### 69 2.1. Description of datasets

70 Whole blood transcriptomic profiles generated from 414 children were included in the  
71 analysis, obtained from children with Kawasaki Disease (KD; n = 178), confirmed (definite) bacterial  
72 infection (DB; n = 54), confirmed (definite) viral infection (DV; n = 120), and healthy controls (HC; n  
73 = 62). Two transcriptomic datasets were used. The ‘discovery’ transcriptomic dataset, which was  
74 generated by HumanHT-12 version 4.0 BeadChips, was used for all steps of the analysis. The  
75 ‘validation’ transcriptomic dataset, which was created by merging two datasets generated by  
76 HumanHT-12 version 3.0 and 4.0 BeadChips, was used to test the classifiers trained on the  
77 discovery dataset.

78 In addition, proteomic profiles from the plasma or serum of 329 children in the same groups  
79 were studied: from children with KD (n = 52), DB (n = 121) and DV (n = 106) infections, and HC (n =  
80 50). Liquid chromatography with tandem mass spectrometry (LC-MS/MS) and the SomaScan [20]  
81 platform were used to generate the proteomic ‘discovery’ and ‘validation’ datasets, respectively.  
82 The ‘discovery’ proteomic dataset, generated from plasma samples using LC-MS/MS, was used for  
83 all steps of the analysis. The ‘validation’ proteomic dataset, generated from serum samples using  
84 the SomaScan platform [20], was used to test the classifiers trained on the discovery dataset.

85 On both ‘omic levels, the datasets that were used as ‘discovery’ datasets were selected due to  
86 their higher number of bacterial and viral samples. There was no overlap between the patients  
87 included in the proteomic datasets and those included in the transcriptomic datasets.

88 KD patients were defined according to AHA guidelines [21]. DB patients had a bacterial  
89 pathogen identified in a sample from a sterile site. DV patients had a virus identified that was  
90 consistent with the presenting syndrome; had no bacteria identified in blood or relevant culture  
91 sites; and had a CRP of <60mg/L. Further details on the clinical definitions used to define the DV  
92 and DB groups can be found in the Supplementary Text.

93 The median ages (months) of KD patients in the transcriptomic discovery and validation  
 94 datasets were 26 (IQR: 29) and 37 (IQR: 34), respectively. The proportions of male KD patients were  
 95 55% and 60% for the transcriptomic discovery and validation datasets, respectively. For the  
 96 proteomic KD group, the median ages (months) were 30 (IQR: 36) and 16 (IQR: 39) for the discovery  
 97 and validation datasets, respectively. The proportion of males was 69% for both the discovery and  
 98 validation datasets (Table S1). Table S2 contains clinical information for the KD patients included in  
 99 the four datasets analysed. The causative pathogens for the patients with bacterial and viral  
 100 infections from all datasets are shown in Table S3. The median duration of fever when the blood  
 101 sample was taken for transcriptomic analysis from KD patients was 5 (range of 2-7 days) and 6 days  
 102 (range of 2-10 days) for the discovery and validation datasets, respectively. For the proteomic KD  
 103 samples, the median duration of fever when the sample was taken was 7 (range of 3-20 days) and  
 104 6.5 days (range of 4-22 days) for the discovery and validation dataset, respectively.

105 **Table 1.** The datasets used in the analysis. KD, DB, DV and HC are abbreviations for Kawasaki  
 106 Disease, definite bacterial, definite viral, and healthy control, respectively. LC-MS/MS is an  
 107 abbreviation for liquid chromatography with tandem mass spectrometry. \* = not used in analysis.

| Dataset name              | GEO accession(s)     | Platform(s) used for generation                                              | KD  | DB | DV | HC  | Citation(s)        |
|---------------------------|----------------------|------------------------------------------------------------------------------|-----|----|----|-----|--------------------|
| Transcriptomic discovery  | GSE73461             | Microarray:<br>HumanHT-12<br>version 4.0                                     | 77  | 31 | 92 | 62  | [18]               |
| Transcriptomic validation | GSE73462<br>GSE73463 | Microarrays:<br>1x HumanHT-12<br>version 3.0<br>1x HumanHT-12<br>version 4.0 | 101 | 23 | 28 | 16* | [19,22]            |
| Proteomic discovery       | NA                   | LC-MS/MS                                                                     | 26  | 73 | 75 | 25  | <i>unpublished</i> |
| Proteomic validation      | NA                   | SomaScan [20]                                                                | 26  | 48 | 31 | 25  | <i>unpublished</i> |

108

## 109 2.2. Comparison of Kawasaki Disease to Bacterial and Viral infection

110 We explored whether the host response during KD is more similar to the host response during  
 111 bacterial or viral infections using transcriptomic (gene-level) and proteomic data. We first assessed  
 112 the variance in the discovery datasets using Principal Component Analysis (PCA; Fig. S1-S2). In the  
 113 transcriptomic dataset, PC1 (29.24%) appears to be capturing lymphocyte number and disease  
 114 group, with the KD patients located between the bacterial and viral groups. In the proteomic  
 115 dataset, PC1 (29.18%) appears to be capturing variation caused by age differences, while PC2  
 116 (13.39%) and PC3 (10.56%) strongly capture the disease group effects, with the KD patients grouped  
 117 together between the clearly separated bacterial and viral groups.

### 118 2.2.1. Differential abundance analysis

119 Limma [23] was used to identify genes and proteins differentially abundant between each  
 120 disease group (KD, DB, DV) and healthy controls (HC), whilst accounting for age, sex and, for the  
 121 transcriptomic dataset, immune cell proportions. Features were considered significantly  
 122 differentially abundant (SDA) at a FDR of 5%. Differential abundance analysis was applied to 13035  
 123 genes and 344 proteins. For the transcriptomics, 3,218, 3,124, and 4,663 genes were SDA between

124 KD vs HC, DB vs HC, and DV vs HC, respectively. For the proteomics, 113, 125, and 78 proteins  
125 were SDA between KD vs HC, DB vs HC, and DV vs HC, respectively. Genes and proteins SDA  
126 between KD vs HC are listed in the Supplementary File 1.

### 127 2.2.2. Pathway analysis

128 The lists of SDA features identified in 2.2.1 were subjected to pathway analysis using  
129 g:Profiler2 [24] to determine which pathways were upregulated and downregulated in the three  
130 disease groups in the discovery datasets for the transcriptomic (Fig.1a) and proteomic (Fig. 1b)  
131 datasets. The full lists of pathways are provided in Supplementary File 2.

132 In the transcriptomic pathway analysis, some pathways were found to be enriched across 2 or  
133 3 of the disease conditions, whereas others were found in a single condition (Fig. 1a). For example,  
134 neutrophil degranulation, which was the top pathway in both KD and bacterial infections, and  
135 vesicle-mediated transport were both upregulated in KD and bacterial infections, whereas antigen  
136 presentation via MHC class I was upregulated in KD and viral infections. Of the top 17 pathways  
137 enriched in KD, 6 pathways were also present with concordant directions in the top bacterial  
138 pathways and 3 were present with concordant directions in the top viral pathways. Seven were  
139 unique to KD.

140 In the proteomics data, all pathways overlapping between KD and either bacterial or viral  
141 infections had concordant directions of regulation (Fig. 1b). Of the top 19 pathways enriched in KD,  
142 13 were also enriched in bacterial samples, 10 in viral samples, and 4 were unique to KD. Eight of  
143 the top 19 KD pathways were enriched in both bacterial and viral samples. All of these are involved  
144 in the immune response. The higher frequency of overlapping concordant pathways makes it  
145 harder to identify differences between the pathways enriched in the proteomic dataset than the  
146 transcriptomic dataset. Overall there was a much lower number of proteins SDA between KD vs  
147 HC ( $n = 113$ ) than genes SDA between KD vs HC ( $n = 3,218$ ). Furthermore, the total number of  
148 proteins remaining following quality control and filtering for missingness ( $n = 344$ ) was much lower  
149 than the total number of genes remaining following quality control ( $n = 13,035$ ), which could justify  
150 why the differences in pathways enriched between the disease groups are more apparent in the  
151 gene expression data.

152 Three pathways were enriched on both 'omic levels. These were: immune effector process  
153 pathway (upregulated in KD and bacterial patients); immune response (upregulated in KD  
154 patients); and vesicle-mediated transport (upregulated in KD and bacterial patients).

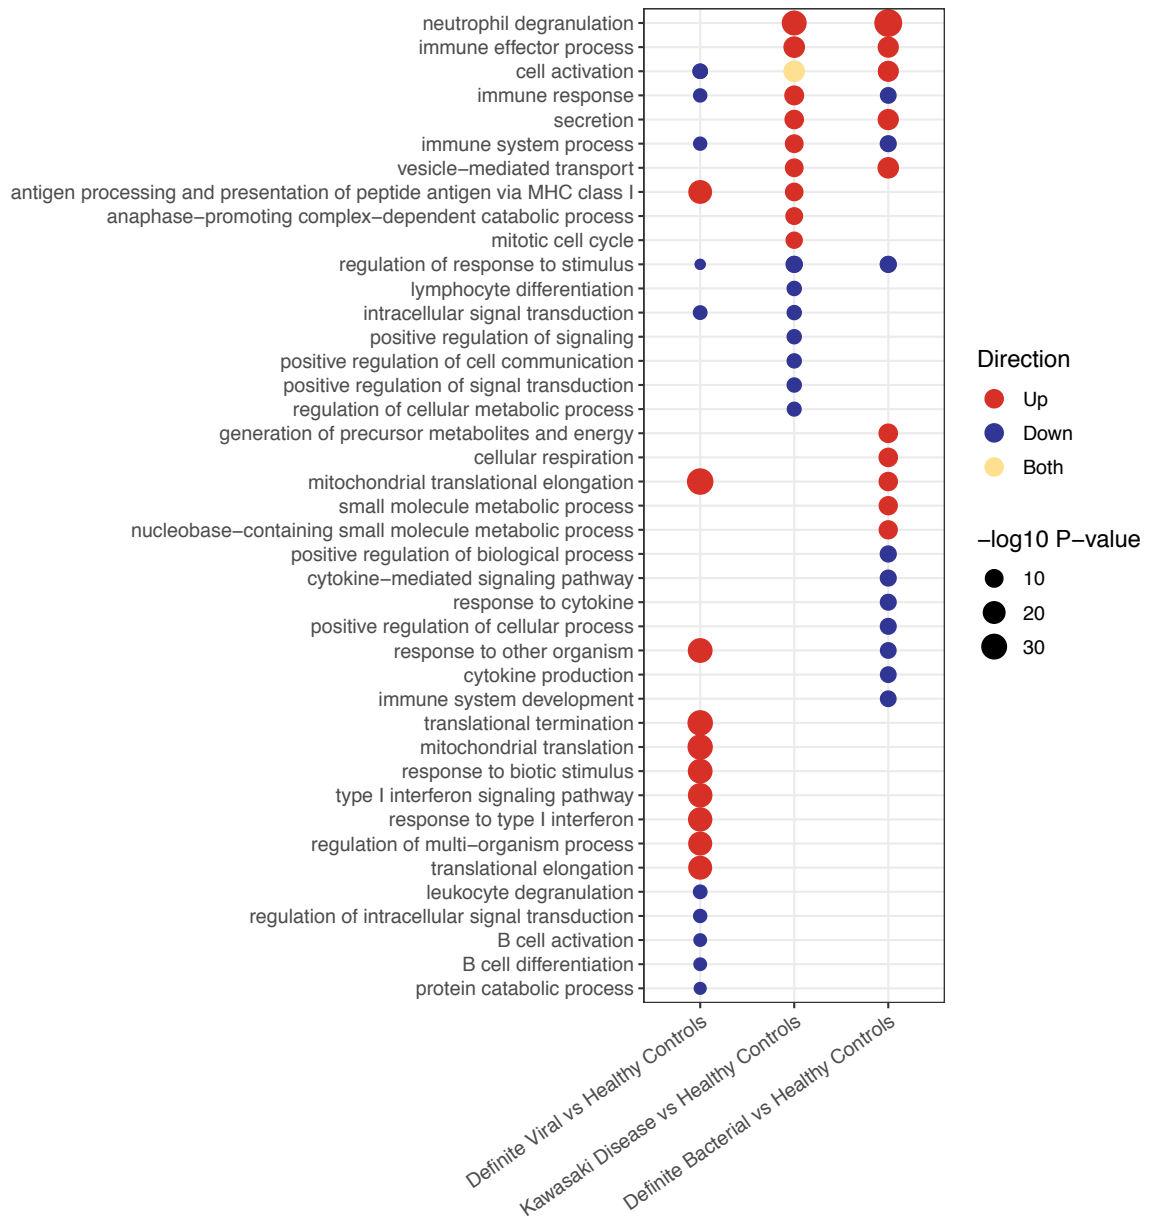

155

156

157

**Figure 1a.** Pathways upregulated and downregulated in bacterial, KD and viral patients compared to healthy controls in the transcriptomic dataset.

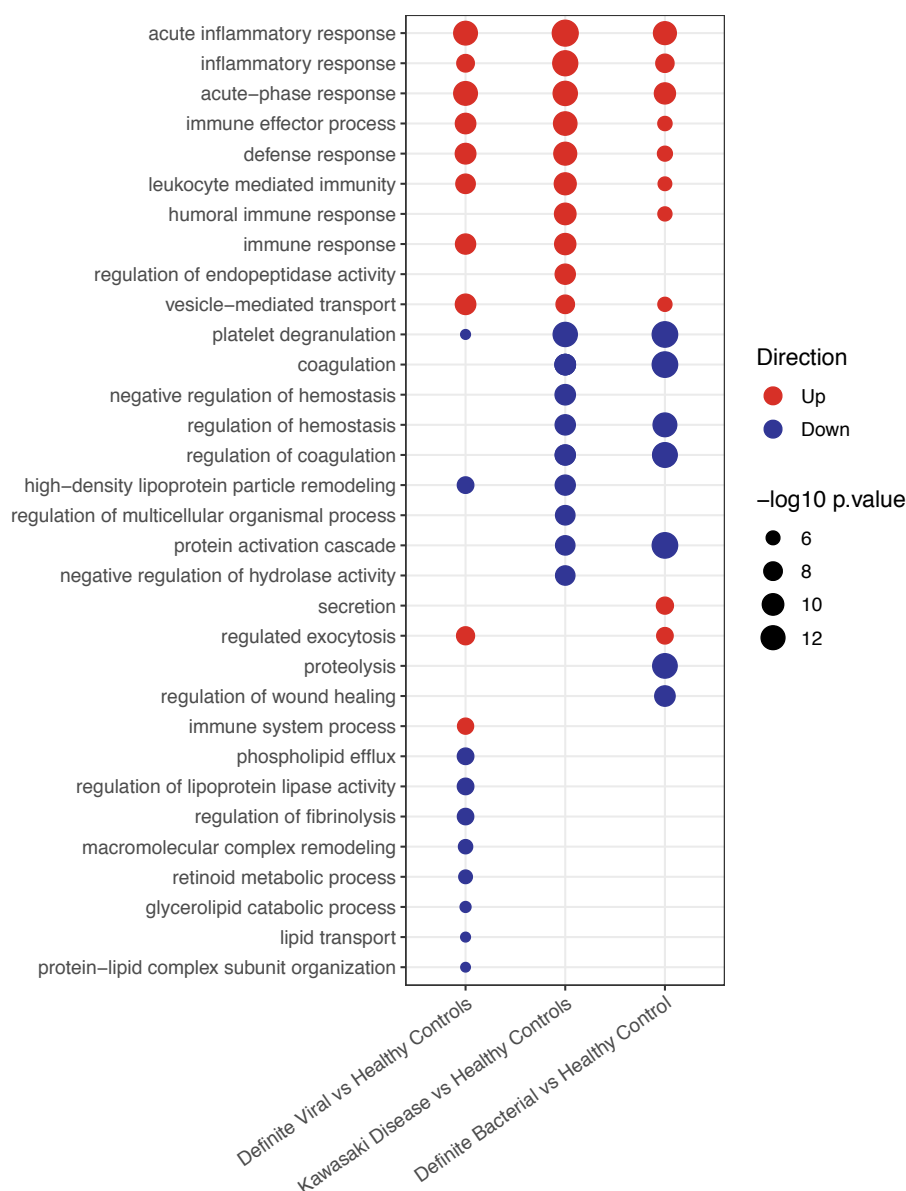

158

159 **Figure 1b.** Pathways upregulated and downregulated in bacterial, KD and viral patients compared  
 160 to healthy controls in the proteomic dataset.

161 2.2.3. Clustering

162 K-Means clustering was used to determine whether the KD patients were more likely to cluster  
 163 with bacterial or viral patients in the discovery datasets. Prior to clustering analysis, gene expression  
 164 values were corrected for age, sex and immune cell proportions by taking the residual gene  
 165 expression values after removing the contributions of these variables. Immune cell proportions were  
 166 estimated using CIBERSORTx [25], an online tool for estimating immune cell proportions from gene  
 167 expression data. The same process was performed to remove the contribution of age and sex from  
 168 the protein abundance values. NbClust [26] was used to determine the optimal number of clusters  
 169 ( $k$ ). The value of  $k$  most frequently selected across the 12 indices measured by NbClust was selected  
 170 as the optimal number of clusters for downstream analyses. In the transcriptomic analysis, 3 clusters  
 171 were identified as optimal, whereas on the protein level, 2 clusters were identified as optimal.

172

173 We assessed the proportion of KD, bacterial and viral patients in each of the clusters for the  
 174 transcriptomic (A) and proteomic (B) datasets (Fig. 2). In the transcriptomic analysis, an over-  
 175 representation of viral patients was observed in cluster 1 and, to a lesser extent, cluster 2. An over-

176 representation of bacterial patients was observed in cluster 3 (Fig. 2), resulting in two viral-like  
177 clusters and one bacterial-like cluster. Of the 77 transcriptomic KD samples, 47 (61%) belonged to  
178 cluster 3, 22 (29%) belonged to cluster 2, and 8 (10%) belonged to cluster 1. In the proteomic  
179 analysis, an over-representation of bacterial patients was found in cluster 1, whereas an over-  
180 representation of viral patients was observed in cluster 2, leading to one viral-like and one bacterial-  
181 like cluster. Of the 26 proteomic KD samples, 24 (92%) belonged to cluster 1 and 2 (8%) belonged to  
182 cluster 2.

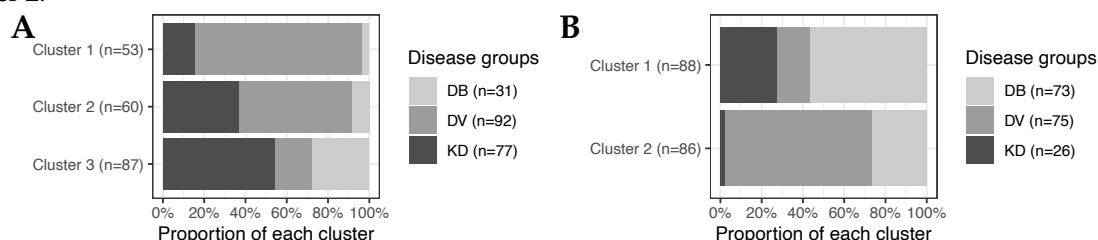

183 **Figure 2.** The proportion of patients from each disease group in each cluster for transcriptomics (A) and  
184 proteomics (B). DB, DV and KD represent definite bacterial, definite viral, and Kawasaki Disease.  
185

186 The association between KD patient cluster membership and various clinical variables was  
187 tested. CRP levels (p-value: 0.048), lymph node swelling (p-value: 0.044), and peeling (p-value:  
188 0.050) were significantly associated with cluster membership of KD transcriptomic samples. Higher  
189 levels of CRP were found in transcriptomic KD samples in cluster 3 which had the highest  
190 proportion of bacterial samples. Out of the 55 patients displaying peeling, 38 were found in cluster  
191 3, as were 17 of the 21 patients with lymph node swelling. No clinical variables were associated  
192 with cluster membership in the proteomic dataset. On both 'omic levels, CRP levels were highest in  
193 the clusters in which the majority of bacterial samples were found (Fig. S5-S6), as expected since a  
194 CRP cut-off of <60mg/L was required for patients in the DV groups. This pattern was also observed  
195 for the WBC counts in the transcriptomic dataset (Fig. S5).

196 Differential abundance analysis was performed to compare feature abundance in the KD  
197 samples that fell into different clusters. There were 503 genes SDA between transcriptomic KD  
198 samples in cluster 1 vs clusters 2 and 3, 454 genes SDA between KD samples in cluster 2 vs clusters  
199 1 and 3, and 651 genes SDA between KD samples in cluster 3 vs clusters 1 and 2. These lists of SDA  
200 genes were subjected to pathway analysis using g:Profiler2 [24] to identify pathways upregulated  
201 and downregulated within the clusters (Fig. 3). Complete lists of pathways are in Supplementary  
202 File 3.

203 For the transcriptomics, cluster 1 had the highest proportion of viral patients compared to the  
204 other clusters (Fig. 2a). The majority of the Adenovirus (19/23) and Influenza (16/23) patients were  
205 in cluster 1. Cluster 1 KD patients were characterised by upregulation of anti-viral response  
206 pathways, such as interferon and cytokine signalling (Fig. 3). In cluster 2, although the majority of  
207 patients were viral, their proportion was not quite as high as it was in cluster 1 (Fig. 2). The majority  
208 of the RSV (15/27) patients were in cluster 2. In the KD patients in cluster 2, various pathways  
209 associated with the anti-viral response were downregulated (Fig. 3). Cluster 3 had the highest  
210 proportion of bacterial patients and KD patients (Fig. 2). Similarly to cluster 2, the top pathways  
211 downregulated for KD patients in cluster 3 were associated with the anti-viral response, while the  
212 inflammatory response pathway was strongly upregulated suggesting that the KD patients in this  
213 cluster were different to those in cluster 1 and that their response was not as viral-like as those in  
214 cluster 1 (Fig. 3).

215 Three pathways - response to biotic stimulus (i.e. a stimulus caused or produced by a living  
216 organism), response to other organism and type I interferon signalling - were upregulated in viral  
217 transcriptomic samples (Fig. 1a) and also in the KD samples in the viral-like cluster 1 (Fig. 3).  
218 Furthermore, four pathways, including two associated with interferon signaling, were upregulated  
219 in viral transcriptomic samples (Fig. 1a) and downregulated in the KD samples in clusters 2 and 3

220 (Fig. 3). There were five pathways downregulated in bacterial transcriptomic samples (Fig. 1a) and  
 221 upregulated in KD transcriptomic samples in cluster 1 (Fig. 3), including two related to cytokine  
 222 signaling.

223 For the proteomic dataset, two proteins were SDA between cluster 1 and 2: serum amyloid A1  
 224 (SAA1) and retinol binding protein 4 (RBP4). Both of these proteins have been identified previously  
 225 as Kawasaki markers, with RBP4 abundance being lower in active KD [27] and SAA1 being  
 226 elevated in KD [28]. The two KD patients in cluster 2 displayed the opposite pattern, with higher  
 227 RBP4 and lower SAA1 abundance than the other KD patients.

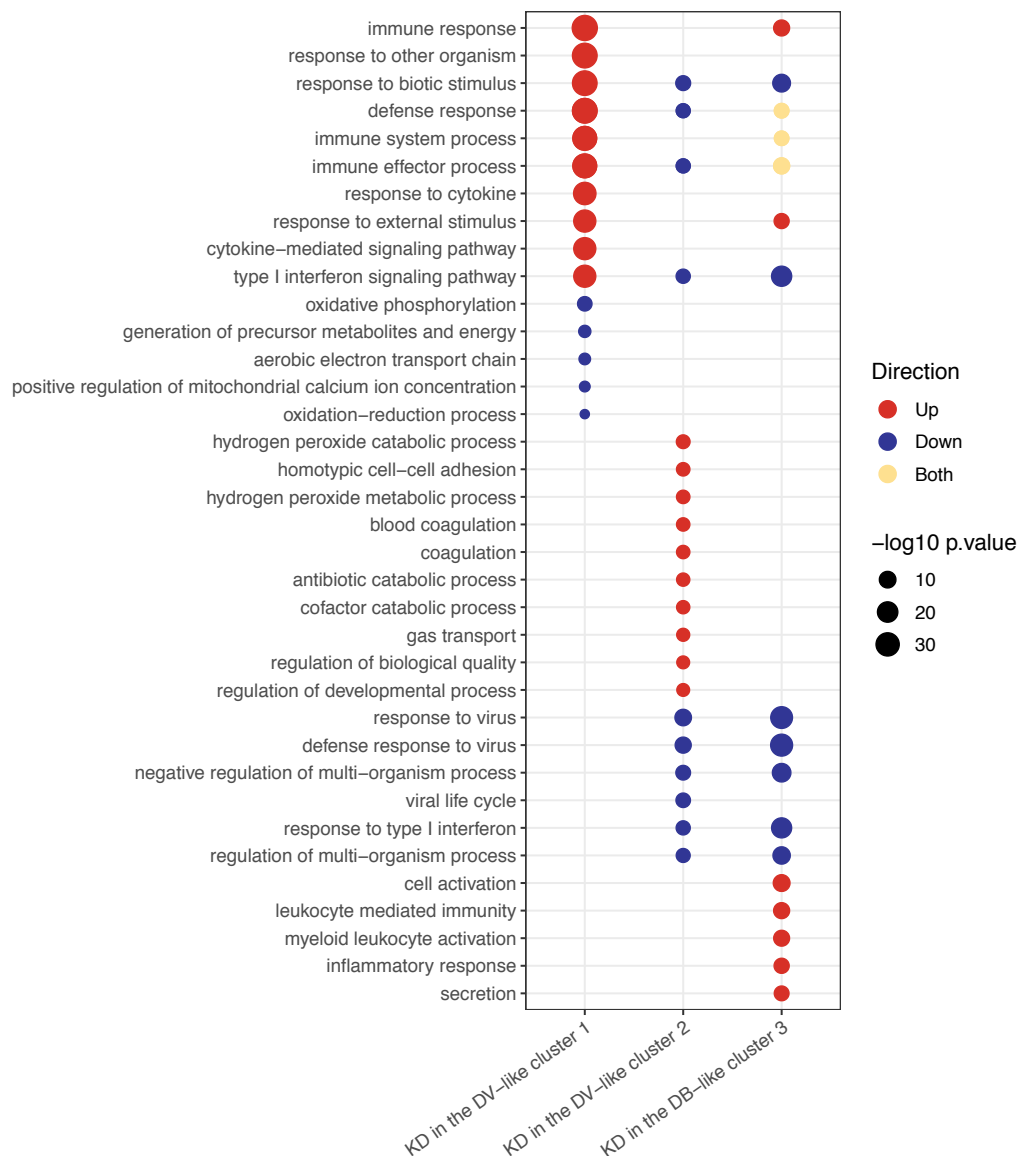

228

229 **Figure 3.** Pathways upregulated and downregulated in the KD patients in clusters 1, 2 and 3 for the  
 230 transcriptomic dataset. Clusters were identified using *K*-Means applied to KD, DB and DV patients.  
 231 There were 151, 52 and 137 pathways upregulated in clusters 1, 2 and 3, respectively, and 5, 66 and 137  
 232 pathways downregulated in clusters 1, 2 and 3, respectively.

#### 233 2.2.4. Classification using Disease Risk Scores

234 To further assess if the KD patients elicited more bacterial-like or more viral-like responses, we  
 235 built two classifiers that returned the probabilities that a patient is bacterial or viral through two  
 236 separate disease risk scores (DRS). A DRS translates the abundance of features in a discriminatory



237 signature, selected by Lasso [29], into a single value that can be assigned to each individual [16].  
238 Through using two independent classifiers, the possibility of a patient being neither bacterial nor  
239 viral was allowed. The classifiers were trained using the 'omic data that was corrected for age, sex  
240 and, for the transcriptomic dataset, immune cell proportions.

241 The Lasso model selected 38 genes for the bacterial classifier, of which 26 had increased  
242 abundance and 12 had decreased abundance in bacterial patients compared to viral patients and  
243 healthy controls (Table S4). The viral classifier included 32 genes, of which 13 had increased  
244 abundance and 19 had decreased abundance in viral patients compared to bacterial patients and  
245 healthy controls (Table S5). The classifiers trained in the transcriptomic discovery dataset were  
246 tested on bacterial and viral patients from the transcriptomic validation dataset. The bacterial  
247 classifier achieved an area under the ROC curve (AUC) of 0.935 (95% CI: 0.869-1) and the viral  
248 classifier achieved an AUC of 0.935 (95% CI: 0.856-1).

249 The Lasso model selected 26 proteins for the bacterial classifier, of which 12 had increased  
250 abundance and 14 had decreased abundance in bacterial patients compared to viral patients and  
251 healthy controls (Table S6). The viral classifier included 20 proteins, of which 11 had increased  
252 abundance and 9 had decreased abundance in viral patients compared to bacterial patients and  
253 healthy controls (Table S7). When testing the classifiers trained in the proteomic discovery dataset  
254 on bacterial and viral patients from the validation dataset, the bacterial classifier achieved an AUC  
255 of 0.925 (95% CI: 0.867-0.984) and the viral classifier achieved an AUC of 0.891 (95% CI: 0.821-0.962).  
256 For both 'omic levels, the 90% sensitivity of the classifiers in classifying these samples was used to  
257 determine the DRS threshold above which a sample would be classified as bacterial or viral.

258 The classifiers were applied to KD patients from the discovery and validation datasets for both  
259 'omic levels, resulting in bacterial DRS (DB-DRS) and viral DRS (DV-DRS) for each KD patient (Fig.  
260 4-5). Classification labels (DB or DV) were assigned to the KD patients using the DB-DRS and DV-  
261 DRS thresholds calculated from applying the classifiers to the bacterial and viral patients in the  
262 validation datasets (Fig. S9). Of the 178 transcriptomic KD samples, 18 (10%) samples had DB-DRS  
263 high enough to be classified as bacterial and 16 (9%) samples had DV-DRS high enough to be  
264 classified as viral. 145 (81%) samples did not achieve DB-DRS nor DV-DRS sufficiently high to lead  
265 to bacterial or viral classification, and 1 sample was classified as both bacterial and viral (Fig. 4). Of  
266 the 52 proteomic KD samples, 40 (78%) achieved DB-DRS high enough to be classified as bacterial  
267 and 18 (35%) achieved DV-DRS high enough to be classified as viral. 10 (19%) proteomic KD  
268 samples achieved DB-DRS and DV-DRS high enough for them to be classified as both bacterial and  
269 viral, and 4 (7.7%) were classified as neither (Fig. 5).

270 To further examine the 'omic profiles of the KD patients with DB-DRS and DV-DRS too low for  
271 them to be classified as either bacterial or viral, we performed pathway analysis on the genes or  
272 proteins SDA between these KD patients and healthy controls. Amongst the pathways upregulated  
273 on the transcriptomic level, were 'defense response to fungus' (p-value: 6.6e-08) and 'response  
274 to fungus' (p-value: 6.7e-07).

275 The associations of DB-DRS, DV-DRS, bacterial classification as predicted from the DB-DRS,  
276 and viral classification as predicted from the DV-DRS, with various clinical variables were tested  
277 for KD samples from both 'omic levels. In the transcriptomic KD samples, clinical measurements of  
278 CRP were positively associated with DB-DRS (p-value: 0.002) and bacterial classification (p-value:  
279 0.0001), and negatively associated with DV-DRS (p-value: 0.002) and viral classification (p-value:  
280 0.023). In the proteomic KD samples, CRP levels were significantly positively associated with DB-  
281 DRS (p-value: 0.013) and bacterial classification (p-value: 0.007). Peeling was significantly  
282 associated with higher DB-DRS on both 'omic levels (transcriptomic p-value: 0.041, proteomic p-  
283 value: 0.007). Strawberry tongue was significantly associated with a low score on the transcriptomic  
284 DV-DRS (p-value: 0.045).

285 For the KD patients from the discovery datasets, the associations between DB-DRS or DV-DRS  
286 and the cluster membership of patients was tested. Transcriptomic KD sample cluster membership  
287 was significantly associated with DB-DRS (p-value: 0.005) and DV-DRS (p-value: 0.0006), with a  
288 stepwise increase in DB-DRS and decrease in DV-DRS from clusters 1 to 3, where cluster 1 was the  
289 most viral-like cluster, and cluster 3 was the most bacterial-like cluster. Proteomic KD sample  
290 cluster membership was significantly associated with DB-DRS (p-value: 0.002) and DV-DRS (p-  
291 value: 0.023), with higher DB-DRS and lower DV-DRS in KD patients in cluster 1, where cluster 1  
292 was the more bacterial-like cluster and cluster 2 was the more viral-like cluster.

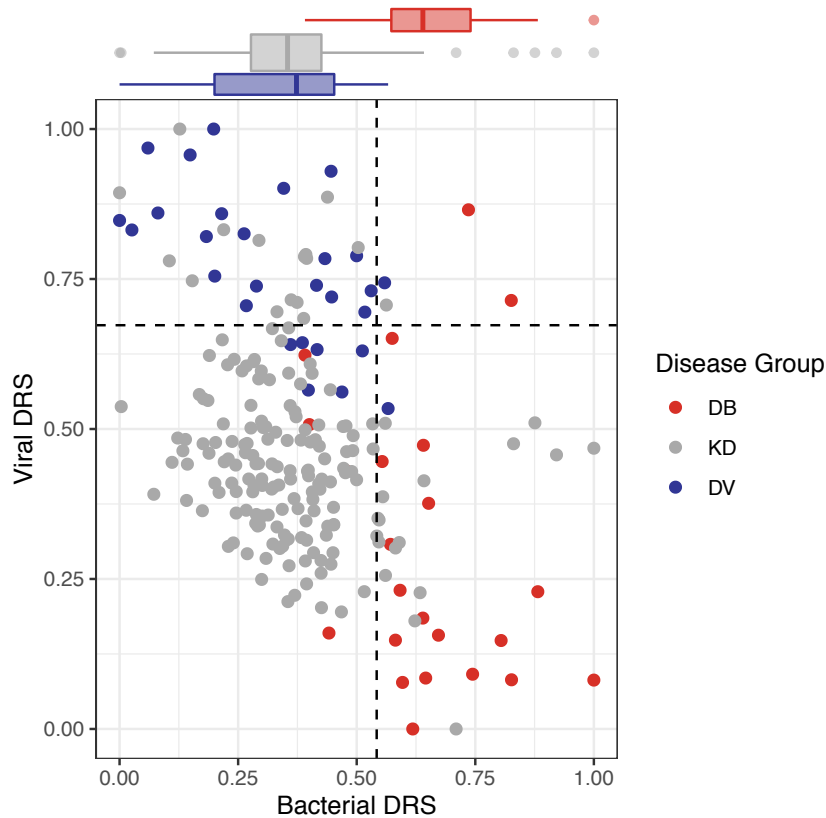

293

294 **Figure 4.** Bacterial DRS (DB-DRS) plotted against viral DRS (DV-DRS) for KD (discovery and validation),  
295 definite bacterial (DB; validation) and definite viral (DV; validation) patients from the transcriptomic datasets.  
296 Boxplots are shown for each disease group.

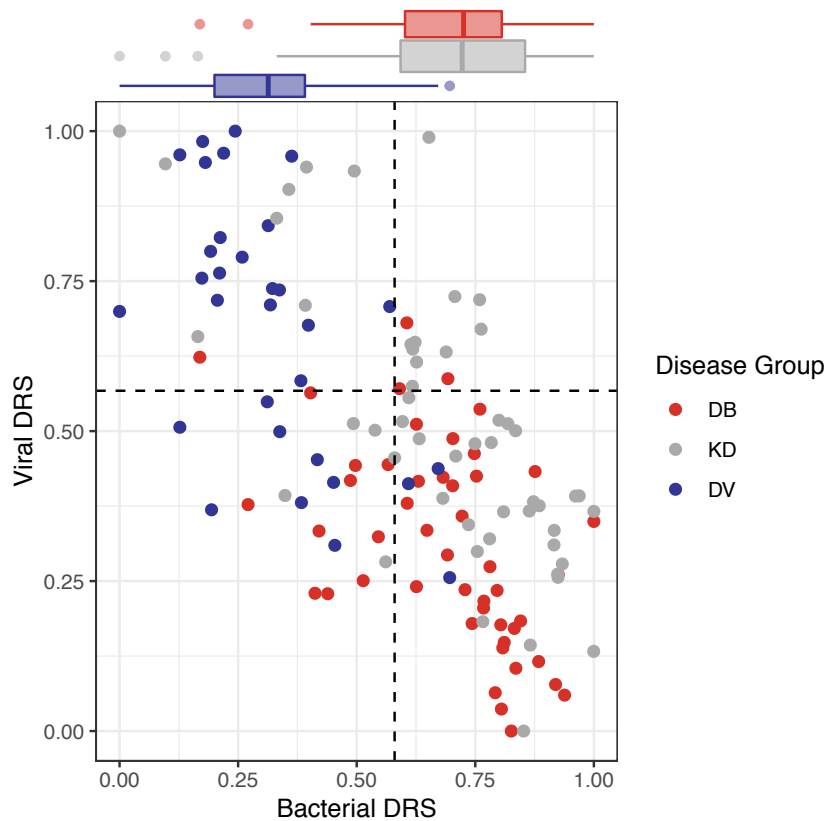

297

298

299

300

**Figure 5.** Bacterial DRS (DB-DRS) plotted against viral DRS (DV-DRS) for KD (discovery and validation), definite bacterial (DB; validation) and definite viral (DV; validation) patients from the proteomic datasets. Boxplots are shown for each disease group.

301

### 2.3. Clustering of Kawasaki Disease patients alone

302

303

304

305

306

307

308

309

We performed unsupervised clustering for the KD patients from the discovery datasets to explore the natural patient stratification formed in the absence of bacterial and viral comparator patients. For both 'omic levels, 3 clusters were optimal, as determined by NbClust [26]. The clusters were identified using the 'omic data that was corrected for age, sex and, for the transcriptomic dataset, immune cell proportions. Of the 77 transcriptomic KD samples, 32 (41%) were in cluster 1 (cluster KD1-T), 23 (30%) were in cluster 2 (cluster KD2-T), and 22 (29%) were in cluster 3 (cluster KD3-T). Of the 26 proteomic KD samples, 4 (15%) were in cluster 1 (cluster KD1-P), 7 (27%) were in cluster 2 (cluster KD2-P), and 15 (58%) were in cluster 3 (cluster KD3-P).

310

311

312

313

314

315

There was high overlap between the samples in cluster KD1-T and those in the transcriptomic bacterial-like cluster 3 described in 2.2.3 (Fig. S10). All except one of the samples found previously in the transcriptomic viral-like cluster 1 were found in cluster KD2-T. The majority ( $n = 14$ ; 64%) of the samples in KD3-T were also found in transcriptomic cluster 2. On the proteome level, in 2.2.3, all KD samples except two clustered together in cluster 1, however the two remaining samples that were previously in cluster 2, were not assigned to the same cluster.

316

317

318

319

320

321

322

323

The association between cluster membership and various clinical variables was tested. CRP levels were significantly associated with cluster membership for both 'omic layers (transcriptomics p-value: 0.041, proteomics p-value: 0.010). Furthermore, coronary artery aneurysm (CAA) formation was significantly associated with cluster membership in the proteomic dataset (p-value: 0.020) with 13 of the 21 patients known to not have CAAs being in cluster KD3-P. On the transcriptomic level, the highest WBC counts and CRP levels were in cluster KD1-T, and on the proteomic level, WBC counts and CRP levels were highest in clusters KD2-P and KD1-P, respectively (Fig. S7-S8).

324 The associations between DB-DRS or DV-DRS and cluster membership of KD patients when  
325 clustered alone was tested. The transcriptomic KD samples' cluster membership was significantly  
326 associated with DB-DRS (p-value: 0.006) with the highest DB-DRS in cluster KD1-T. Although the  
327 association between transcriptomic KD samples' cluster membership and DV-DRS was not  
328 significant, the highest DV-DRS values were observed in cluster KD2-T. There were no significant  
329 associations between the proteomic KD samples' cluster membership and DB-DRS or DV-DRS.

330 Differential abundance analysis was performed on the patients that fell into different clusters.  
331 For the transcriptomics, there were 494 genes SDA between cluster KD1-T vs clusters KD2-T and  
332 KD3-T, 461 genes SDA between cluster KD2-T vs clusters KD1-T and KD3-T, and 320 genes SDA  
333 between cluster KD3-T vs clusters KD1-T and KD2-T. For the proteomics, 42 proteins were SDA  
334 between cluster KD1-P vs clusters KD2-P and KD3-P, 25 proteins were SDA between cluster KD2-P  
335 vs clusters KD1-P and KD3-P, and 38 proteins were SDA between cluster KD3-P vs clusters KD1-P  
336 and KD2-P. These lists of SDA features were subjected to pathway analysis using g:Profiler2 [24] to  
337 identify pathways upregulated and downregulated within the clusters (Fig. 6). Complete lists of  
338 pathways are found in Supplementary Files 4-5.

339 In the transcriptomic analysis (Fig. 6a), cluster KD2-T had features in common with an anti-  
340 viral response, whilst the others did not. Many pathways associated with the anti-viral response  
341 were downregulated in clusters KD1-T and KD3-T whilst patients in cluster KD2-T were  
342 characterised by the upregulation of viral pathways, including those associated with cytokine  
343 signaling.

344 The response to biotic stimulus and type I interferon signaling pathways were previously  
345 identified as being upregulated in viral transcriptomic samples (Fig. 1a) and in KD samples in the  
346 viral-like cluster 1 when *K*-Means was applied to KD, DB and DV (Fig. 3). These pathways were  
347 downregulated in clusters KD1-T and KD3-T (Fig. 6a), indicating that the transcriptomic response  
348 in these samples was less viral-like than samples in cluster KD2-T.

349 Four pathways previously identified as being downregulated in bacterial transcriptomic  
350 samples (Fig. 1a), including two pathways associated with cytokine signaling, were upregulated in  
351 cluster KD2-T. In addition, six pathways upregulated in cluster KD2-T had already been identified  
352 as being upregulated in the viral-like cluster 1 identified previously (Fig. 3). Five pathways of the 9  
353 top upregulated pathways in cluster KD3-T (Fig. 6a) were also upregulated in cluster 2 when *K*-  
354 Means was applied to KD, DB and DV (Fig. 3). These were blood coagulation, hydrogen peroxide  
355 catabolic process, antibiotic catabolic processes, hydrogen peroxide metabolic process and  
356 regulation of biological quality.

357 In the proteomic analysis (Fig. 6b), one of the KD clusters had features in common with the  
358 anti-viral response, whilst another KD cluster was more bacterial-like. Amongst the top pathways  
359 enriched in cluster KD1-P and KD2-P were pathways involved in inflammation. The top pathways  
360 enriched in cluster KD3-P were associated with lipids. Of the 37 pathways enriched in the  
361 proteomic KD samples (Fig. 6b), 21 were previously identified as enriched in proteomic samples  
362 (Fig. 1b). Of these, 6 were enriched in proteomic viral samples (Fig. 1b) and samples in cluster KD2-  
363 P (Fig. 6b) with concordant directions. Furthermore, 7 pathways enriched in cluster KD1-P (Fig. 6b)  
364 were also enriched in bacterial proteomic samples (Fig. 1b) with concordant directions. These  
365 results suggest that cluster KD1-P is a more bacterial-like cluster, whereas cluster KD2-P is a more  
366 viral-like cluster. Some pathways were enriched on both 'omic levels, including those associated  
367 with blood coagulation, the response to stress and immune effector processes.

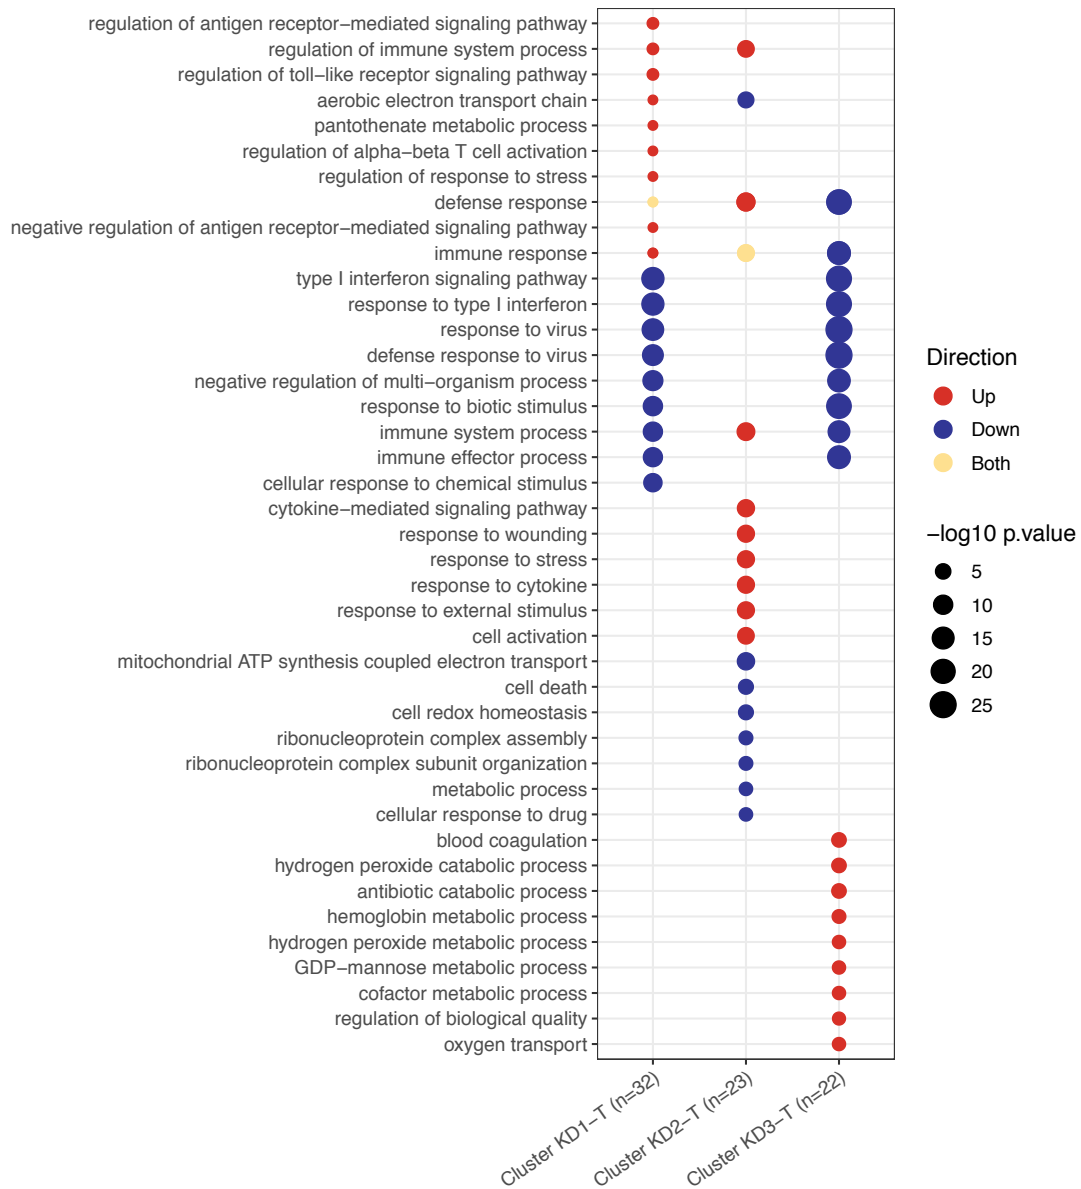

368

369

370

371

372

**Figure 6a.** Pathways upregulated and downregulated in transcriptomic KD patients between clusters. Clusters were identified by K-Means ran on KD patients alone. There were 24, 118 and 24 pathways upregulated in clusters KD1-T, KD2-T and KD3-T, respectively, and 94, 68 and 75 pathways downregulated in clusters KD1-T, KD2-T and KD3-T, respectively.

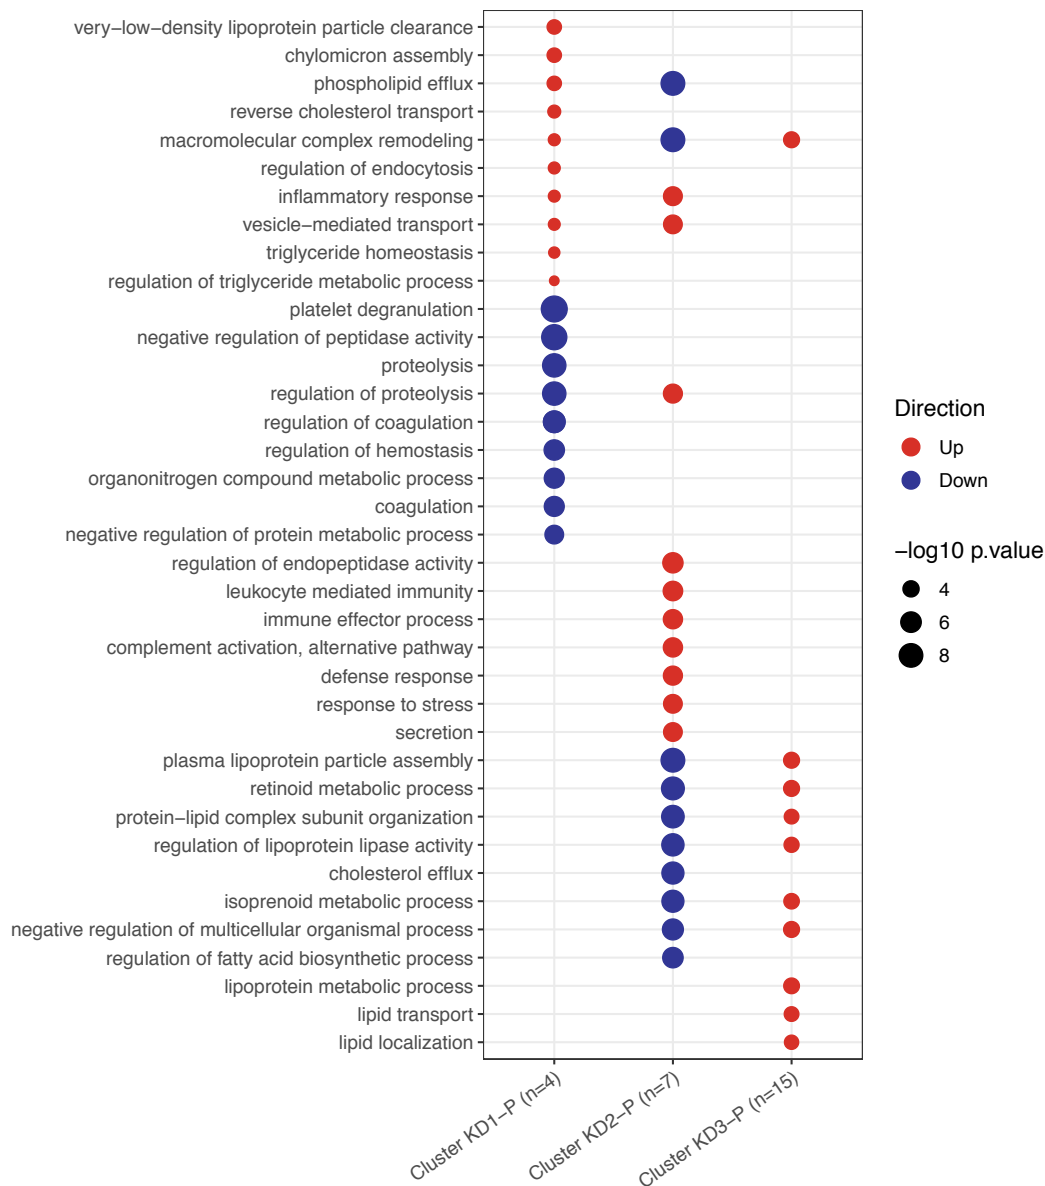

373

374

375

376

377

**Figure 6b.** Pathways upregulated and downregulated in proteomic KD patients between clusters. Clusters were identified by *K*-Means ran on KD patients alone. There were 77, 94 and 61 pathways upregulated in clusters KD1-P, KD2-P and KD3-P, respectively, and 64, 104 and 53 pathways downregulated in clusters KD1-P, KD2-P and KD3-P, respectively.

378

### 3. Discussion

379

380

381

382

383

384

385

386

387

Although the cause of Kawasaki Disease has not been identified, there is growing clinical, epidemiological and immunological evidence that it may be caused by different infectious triggers, with data pointing to bacteria, viruses or fungi. We explored the transcriptomes and proteomes of children with KD and definite bacterial and viral infections, using multiple approaches to compare the host response to these diseases to the response during KD. We found that there was a diversity of responses in the proteomic and transcriptomic profiles of KD patients, suggesting that KD is not a homogenous condition, and that whilst some patients had a more viral- or bacterial-like profile, the majority were defined as neither bacterial nor viral when their transcriptomic response was mapped onto viral and bacterial disease risk scores (DRS).

388

389

Within the host response profiles, some elements of KD appeared more viral-like and some elements appeared more bacterial-like. This is shown through overlapping pathways that were

390 enriched in KD and either bacterial or viral infections. For example, the antigen presentation via  
391 MHC class I pathway was upregulated in KD and viral infections on the transcriptomic level. Major  
392 histocompatibility complex (MHC) molecules are expressed on the cell surface to present antigenic  
393 peptides to T cells, and their expression is increased by a broad range of immune activators  
394 including interferons [30,31]. The finding of upregulated MHC class I expression in KD and viral  
395 patients may reflect interferon-induced activation in these groups. Also, on the transcriptomic level,  
396 KD and bacterial infections share neutrophil degranulation as their most upregulated pathway.  
397 Neutrophils are the first responders to infection and inflammation, and the expansion and  
398 activation of the neutrophil population is a characteristic feature of acute KD. In the initial days of  
399 KD illness there is an intense inflammatory response with neutrophil leucocytosis [32]. Studies have  
400 found elevated levels of human neutrophil elastase and IL-8, a C-X-C chemokine that activates  
401 neutrophils [33,34].

402 The host response during KD is highly heterogenous, as demonstrated through the enrichment  
403 of certain pathways in the KD patients in different clusters when *K*-Means was applied to KD,  
404 bacterial and viral transcriptomic samples. For example, anti-viral response pathways were  
405 upregulated in KD patients in the majority viral cluster 1 and downregulated in KD patients in  
406 clusters with decreasing numbers of viral samples (cluster 2, 3), relative to each other. In the  
407 majority bacterial cluster 3, pathways associated with the inflammatory response were upregulated.  
408 The heterogeneity of the host response during KD was also apparent when *K*-Means was applied to  
409 KD patients alone. Three distinct clusters were identified on both 'omic levels, and, in each cluster,  
410 a distinct set of pathways was enriched. The range of pathways enriched in the different clusters  
411 further demonstrate the heterogeneity in the host response during KD, with some clusters enriched  
412 for viral response pathways and some clusters enriched for bacterial response pathways.  
413 Unsurprisingly, amongst the patients clustering in the more bacterial-like clusters, their DB-DRS  
414 tended to be higher, and amongst the patients clustering in the more viral-like clusters, their DV-  
415 DRS tended to be higher.

416 The two different approaches to clustering (with and without bacterial and viral comparator  
417 samples) produced similar clusters of KD patients, providing reassurance that the clusters  
418 described here are biologically meaningful. Despite the similarities, however, the clusters identified  
419 in 2.2.3 and 2.3 were not completely identical, indicating that the inclusion of well characterized  
420 bacterial and viral patients adds further insights to the solely data-driven KD-based analysis.

421 Although there are shared features between the response to KD and both bacterial and viral  
422 infections, the distinct pathways enriched in each disease group demonstrate the variation in the  
423 molecular host response; the distinctiveness of the responses is also supported by the ability of  
424 RNA and protein signatures to discriminate KD from bacterial and viral infections [18,19,35]. These  
425 differences between the response during KD and the responses to bacterial and viral infections  
426 suggest that KD may be triggered by a novel process not typical of either common bacterial or viral  
427 infections. Despite the host omics profiles' heterogeneity observed in KD, commonalities are also  
428 shown.

429 A two-way classifier approach highlighted that it is not a simple dichotomous question as to  
430 whether the response during KD more closely resembles the responses to bacterial or viral  
431 infections, when focusing on key discriminatory features. We found that 145 of the 178  
432 transcriptomic KD samples were not assigned DRS high enough for them to be classified as either  
433 bacterial or viral, and amongst pathways upregulated in these KD patients compared to healthy  
434 controls were two pathways associated with the fungal response. This finding is intriguing, given  
435 the evidence suggesting that KD could be caused by a fungal trigger that has been reported  
436 elsewhere [36,37].

437 The heterogeneity and the different clusters of responses to KD which have elements shared  
438 with bacterial, viral or fungal responses, could indicate multiple microbial triggers of KD, as has  
439 been suggested by Rypdal et al. [11]. An alternative explanation for the heterogeneity observed here  
440 in the response during KD could be that a single pathogen that causes KD leads to heterogeneous  
441 responses in different hosts, as has been observed in children infected with SARS-CoV-2, where  
442 many children remain asymptomatic, some experience severe inflammation [38,39], and some  
443 develop PIMS-TS/MIS-C [13,14,40]. Variations in the host condition, such as epigenetic differences  
444 and differences in prior pathogen exposure, could cause the spectrum of host responses to KD  
445 observed here. Differences in host genetics could also be responsible for the heterogeneity in host  
446 response during KD as the severity of KD, including the formation of CAAs, is already known to be  
447 impacted by the host's genetic background [41].

448 This study has certain limitations. The proteomic discovery dataset was a lower dimensional  
449 dataset (n= 867) than the transcriptomic discovery dataset (n=47,323) with high rates of missingness,  
450 as is common in quantitative proteomics. Only proteins with no missingness were used for the  
451 clustering and classification, so key proteins for distinguishing KD could be absent from the  
452 analysis. On the proteomic level, many pathways were enriched in multiple disease groups (Fig.  
453 1b), making it difficult to identify a disease-specific pathway signature. This could be caused by  
454 plasma samples, which were used in this dataset, capturing a noisy signal due to the release of  
455 substances from various tissues into the bloodstream. The proteomic response during KD shared  
456 more similarities with the proteomic response to bacterial infection, with more pathways  
457 overlapping between KD and bacterial infections (Fig. 1b) and all but two KD proteomic samples  
458 clustering with bacterial proteomic samples (Fig. 2). This follows observations of striking clinical  
459 similarities between KD and bacterial streptococcal and staphylococcal toxic shock syndromes  
460 [42,43], and could reflect the hypothesis that the proteome is closer to the observed phenotype than  
461 the transcriptome [44].

462 Although bacterial patients with known viral coinfections have been removed from the  
463 analysis, it is impossible to say with confidence that an individual does not have a coinfection, the  
464 presence of which could falsely increase heterogeneity in the host response in a given disease  
465 group. Coinfection is common in KD, with one study identifying confirmed infections in a third of  
466 KD patients [45]. Despite being unable to rule-out that some KD patients included had co-incident  
467 viral or bacterial infections, we found that most KD transcriptomic samples were neither classified  
468 as viral nor bacterial when the respective DRS scores were applied. Amongst the patients classified  
469 as bacterial or viral, it is possible that some patients could be suffering from an intercurrent  
470 infection in addition to KD.

471 There are variations in the range of bacterial and viral pathogens and the severity of illness  
472 represented in the two 'omic datasets. The bacterial and viral patients included in the  
473 transcriptomic datasets and the proteomic validation dataset were more severely unwell than those  
474 included in the proteomic discovery dataset (Table S3) due to the inclusion criteria of the studies to  
475 which they were recruited. The KD patients included in the transcriptomic dataset were collected  
476 from San Diego, USA, whereas the KD patients included in the proteomic dataset were collected  
477 from London, UK, although the same case definition was used. There remains no diagnostic test for  
478 KD, thus some KD patients presented here may have unrecognized alternative diagnoses. The 2 KD  
479 samples in the proteomic dataset that cluster separately (Fig. 2b) and are distinguished from the  
480 other KD samples by their levels of SAA1 and RBP4, two previously identified KD markers [27,28],  
481 are a possible example of this.

482



## 483 4. Materials and Methods

### 484 4.1. Patient recruitment

485 All samples were obtained from patients with written parental informed consent. Case  
486 definitions can be found in the Supplementary Text. The definite bacterial (DB), definite viral (DV),  
487 healthy control (HC) and Kawasaki Disease (KD) samples used in the transcriptomic discovery and  
488 validation datasets were recruited in the United Kingdom and Spain as part of the IRIS  
489 (Immunopathology of Respiratory, Inflammatory and Infectious Disease; NIHR ID 8209) and  
490 GENDRES (Genetic, Vitamin D, and Respiratory Infections Research Network;  
491 <http://www.gendres.org>) studies [17,22] and in the United States through the US-Based Kawasaki  
492 Disease Research Center Program  
493 (<https://medschool.ucsd.edu/som/pediatrics/research/centers/kawasaki-disease/pages/default.aspx>).

494 The DB, DV and HC samples used in the proteomic discovery and validation datasets were  
495 enrolled in the EUCLIDS (European Union Childhood Life-Threatening Infectious Disease Study;  
496 11/LO/1982) study [46] and the PERFORM (Personalised Risk assessment in Febrile illness to  
497 Optimise Real-life Management across the European Union) study (<https://www.perform2020.org/>;  
498 16/LO/1684). KD samples used in the proteomic datasets were recruited from the ongoing UK  
499 Kawasaki study “Genetic determinants of Kawasaki Disease for susceptibility and outcome”  
500 (13/LO/0026). This study recruits acutely unwell children with KD during hospital admission in  
501 participating hospitals around the UK.

### 502 4.2. Data generation

#### 503 4.2.1. Transcriptomic datasets

504 The transcriptomic discovery dataset was generated from whole blood samples obtained from  
505 KD patients, healthy controls, and patients with bacterial and viral infections using the HumanHT-  
506 12 version 4.0 (Illumina) microarray[18]. In order to have a transcriptomic validation dataset  
507 containing the same disease groups as the transcriptomic discovery dataset, two datasets were  
508 merged. One dataset contained gene expression values (HumanHT-12 version 4.0 Illumina  
509 microarray) from whole blood samples obtained from acute and convalescent KD samples [19]. The  
510 other dataset consisted of gene expression values (HumanHT-12 version 3.0 Illumina microarray)  
511 from whole blood samples obtained from patients with bacterial and viral infections [22]. For all  
512 three independent microarray experiments, one batch of samples was processed, and samples were  
513 randomly positioned across the arrays.

#### 514 4.2.1. Proteomic datasets

515 The proteomic discovery dataset was generated from plasma samples using LC-MS/MS. Full  
516 details of the experimental protocol are in the Supplementary Text. The proteomic validation  
517 dataset was generated from serum samples using the SomaScan aptamer-based platform [20]. Prior  
518 to pre-processing, 867 proteins were measured in the discovery dataset (LC-MS/MS) and 1,300 in  
519 the validation dataset (SomaScan). Samples in the proteomic validation dataset were split across  
520 three plates with KD, DB, DV and HC samples present on each plate in relative proportions.

### 521 4.3. Statistical methods

522 All analysis was conducted using the statistical software R (R version 3.6.1, [49]). Code used for the  
523 analytical pipeline described here is found at [https://github.com/heather-](https://github.com/heather-jackson/KawasakiDisease_IJMS)  
524 [jackson/KawasakiDisease\\_IJMS](https://github.com/heather-jackson/KawasakiDisease_IJMS). Note, the code is signposted for the transcriptomic datasets but can  
525 be modified for other ‘omic levels.

#### 526 4.3.1. Pre-processing of gene expression data

527 Background correction, robust spline normalisation (RSN), and log<sub>2</sub>-transformation were  
528 applied to the raw discovery gene expression dataset using the R package lumi [47]. Probes were

529 retained if at least 80% of samples in each comparator group had a detection p-value <0.01. Low  
530 variance probes and those significantly associated with the UCSD recruitment site were removed.  
531 Bacterial samples with known viral coinfections were removed from the analysis at this stage to  
532 ensure that the signal from the bacterial samples was not diluted. KD samples that had been  
533 administered IVIG treatment were also removed at this stage, but their inclusion was irrespective of  
534 coincident viral or bacterial detection, for which data was not available. A KD sample previously  
535 identified as an outlier [18] was removed.

536 As mentioned, two microarray gene-expression datasets were merged to form the validation  
537 dataset. Background subtraction and RSN normalisation were applied to these two datasets  
538 independently, using the R package lumi [47], prior to using ComBat [48] to remove the batch effects  
539 in the merged dataset [18].

540

#### 541 4.3.2. Pre-processing of protein abundance data

542 The raw discovery dataset files generated by LC-MS/MS were processed using MaxQuant  
543 (1.6.10.43) [50], with matching between runs activated. Relative quantification was performed using  
544 the MaxLFQ algorithm [51]. The resulting LFQ values were log<sub>2</sub>-transformed. Bacterial samples with  
545 known viral coinfections were removed from the analysis at this stage to ensure that the signal from  
546 the bacterial samples was not diluted. Protein groups were removed if they were identified as  
547 contaminants, or if they were missing in over 90% of samples in each disease group.

548 The proteomic validation dataset was generated from the SomaScan platform [20]. Quality  
549 control steps used scale factors returned from SomaScan to correct for variations in aptamer  
550 hybridisation efficiency, inter- and intra-assay variability, variability in the starting quantities of  
551 proteins, and plate effects. Further batch effect corrections were carried out using COCONUT  
552 normalisation [52].

553

#### 554 4.3.3. Comparison of Kawasaki Disease to bacterial and viral infections

##### 555 4.3.3.1. Differential abundance analysis

556 Differential abundance analysis was carried out to compare the overall transcriptomic and  
557 proteomic responses to KD, definite bacterial (DB) and definite viral (DV) infections. The degree to  
558 which genes and proteins were differentially abundant between KD and healthy controls (HC), DB  
559 and HC, and DV and HC was quantified using Limma [23] on the transcriptomic and proteomic  
560 discovery datasets separately. Age and sex were included as covariates for both datasets. Immune  
561 cell proportions, calculated using the online CIBERSORTx portal [25], were used as additional  
562 covariates for the transcriptomic dataset. The immune cell proportions included were lymphocytes,  
563 neutrophils, monocytes, mast cells and eosinophils. Features were considered significantly  
564 differentially abundant (SDA) at a false discovery rate (FDR) [53] of 5%.

565

##### 566 4.3.3.2. Pathway analysis

567 The pathways upregulated and downregulated in KD, DB, and DV samples were identified  
568 from the lists of SDA features identified for each disease group in as outlined in 4.3.3.1. Pathways  
569 were identified using g:Profiler2 [24] and redundancy in the pathways identified was removed  
570 using REVIGO [54].

##### 571 4.3.3.3. Clustering analysis

572 K-Means clustering [55] was applied separately to transcriptomic and proteomic discovery  
573 datasets. Healthy controls were excluded as we were only interested in the clustering of KD with  
574 pathological patients. For the proteomic dataset, only proteins with no missing data points were  
575 used (n = 106).

576 To explore the effects of sex and age on clustering in the proteomic dataset, the contribution of  
577 these variables was removed by regressing out their effects on every protein and taking the residual

578 values as the 'corrected' abundance. This process was also followed in the transcriptomic dataset  
579 but the contributions of the immune cell proportions listed in 4.3.3.1 were also removed. Prior to  
580 clustering, and after correction, features were removed if their variance was lower than 0.25. To  
581 determine the optimal number of clusters ( $k$ ) for each corrected and non-corrected dataset, the R  
582 package NbClust [26] was used, with 12 indices tested. The indices tested were: KL [56], CH [57],  
583 Hartigan [58], McClain [59], Dunn [60], SDIndex [61], SDbw [62], C-Index [63], Silhouette [64], Ball  
584 [65], Ptbiserial [66,67] and Ratkowsky [68]. The number of clusters tested by NbClust ranged  
585 between 2-10 clusters. The most frequently selected  $k$  by the 12 indices was used for downstream  
586 analyses. The lowest  $k$  selected the most frequently was taken in cases where there were multiple  
587 values of  $k$  selected the most frequently.

588 Once clusters were identified, features that were SDA (5% FDR) between KD samples in the  
589 different clusters were identified. Pathway analysis was done using these lists of SDA features to  
590 determine the pathways upregulated and downregulated in KD samples in the different clusters.  
591 The R package g:Profiler2 [24] was used for pathway analysis, with pathways with p-values < 0.01  
592 considered significant. Redundancy in the pathways identified was removed using REVIGO [54].

593 The association between cluster membership and various clinical variables was tested. For  
594 categorical variables, Fisher's Exact test was used. For continuous variables, One-Way ANOVA was  
595 used. P-values < 0.05 were considered significant. The categorical variables tested in both datasets  
596 were: strawberry tongue (yes/no/unknown); lymph node swelling (yes/no/unknown); and peeling  
597 (yes/no). Continuous variables tested in both datasets were: levels of C-reactive protein (CRP);  
598 month of year; and the duration of fever at sampling. Coronary artery aneurysms (CAA) was  
599 available only as a dichotomous variable for the patients submitted for proteomic analysis. For the  
600 patients submitted for transcriptomic analysis, maximal coronary artery Z-scores were available  
601 and were used instead.

#### 602 4.3.3.4. Classification

603 Two independent classifiers were built for each 'omic dataset. One classifier was for classifying  
604 DB patients (DB classifier), and the other for classifying DV patients (DV classifier). The DB  
605 classifiers and DV classifiers were trained on features SDA between DB vs DV and HC patients  
606 combined, and DV vs DB and HC patients combined, respectively. Only features present in both  
607 datasets (discovery and validation) were used for training the classifiers. The discovery datasets  
608 that were corrected for age, sex, and, for transcriptomics, immune cell proportions were used to  
609 train the classifiers. The validation datasets were also corrected for age, sex and, for the  
610 transcriptomic validation dataset, immune cell proportions as determined by CIBERSORTx [25].  
611 The proteomic discovery and validation datasets were generated using different platforms.  
612 Therefore, each dataset was scaled so that all abundance values were between 0-1, and then the two  
613 datasets were quantile normalised together. Proteins with no missing values that were also found in  
614 the proteomic validation dataset were used to train the proteomic classifier.

615 The DB classifiers were trained to identify DB patients from DV and HC patients, whereas the  
616 DV classifiers were trained to identify DV patients from DB and HC patients. Lasso regularised  
617 regression [29] was used to identify the discriminatory features and their weights for each classifier.  
618 For each sample, a disease risk score (DRS) was calculated using the abundance of the features  
619 selected by Lasso, as described by Kafrou et al. in [16]. The DRS was calculated by totalling the  
620 abundance of features with positive Lasso weights and subtracting from this total the abundance of  
621 features with negative Lasso weights. Features were only included in the DRS if their Lasso weight  
622 direction and log-fold change direction were concordant. DRS were scaled between 0-1.

623 The classifiers were tested on the DB and DV patients of their respective validation dataset.  
624 The cut-off threshold above which a sample was classified as DB or DV was calculated using the  
625 coords function in the R package pROC [69] using a sensitivity cut-off of 90%. The classifiers were  
626 then tested on the KD patients from the discovery and validation datasets and the thresholds

627 identified by pROC were used to determine if the KD patients were classified as DB or DV. If  
628 patients were classified as neither bacterial nor viral according to their DRS, differential abundance  
629 analysis followed by pathway analysis (as described in 4.3.3.2) was done to identify the pathways  
630 enriched in these patients compared to healthy controls.

#### 631 4.3.4. Exploration of Kawasaki Disease samples alone

632 In order to identify the natural clusters formed by KD patients in the absence of bacterial or  
633 viral patients, K-Means clustering was done separately on the KD patients. The process followed  
634 was the same as outlined in 4.3.3.3. The association between cluster membership and clinical  
635 variables was tested. The clinical variables and the statistical tests used were the same as outlined in  
636 4.3.3.3.

## 637 5. Conclusions

638 Taken together, the results from differential abundance analysis, pathway analysis, clustering  
639 and classification suggest that the host transcriptomic and proteomic responses during KD are highly  
640 heterogenous. Different clusters of host responses during KD were identified, some of which  
641 resemble elements of host responses to bacterial, viral and fungal infections. These differences in the  
642 host responses could imply that KD is triggered either by several different pathogens, or by a single  
643 pathogen that has different manifestations according to the underlying genetic and environmental  
644 situation of the host. Whilst there are similarities between the host response during KD and the host  
645 response to bacterial infections and viral infections, there are also many differences in the responses,  
646 suggesting that KD may be triggered by a novel process not typical of either common bacterial or  
647 viral infections. This was demonstrated by the majority of the KD transcriptomic samples falling into  
648 a non-bacterial, non-viral group following classification, raising the possibility that the minority of  
649 KD transcriptomic samples with bacterial or viral profiles were possibly suffering from intercurrent  
650 infection in addition to a separate KD trigger. Our data further suggest that research into the  
651 etiologies of KD should be focused on cohorts of KD patients who share similar clinical characteristics  
652 in order to identify shared molecular responses.

653 **Author Contributions:** Conceptualization: MK and ML; methodology: SH, HJ, AM, SM, CCP, MK; formal  
654 analysis: HJ, AM, MK; investigation: SH, MJ, SM, CCP, CS, VW; resources: JCB, RG, SH, MJ, SM, CS, AHT, VW;  
655 data curation: JCB, SH, JH, HJ, AM, SM, CS, VW; writing—original draft preparation: HJ; writing—review and  
656 editing: ALL; validation: HJ; visualization: HJ; supervision: JH, ML, MK; project administration: HJ, CS, VW,  
657 MK; funding acquisition: HJ, SM, SH, RG, AHT, MJ, TK, VW, JCB, CP, JH, ML, MK. All authors have read and  
658 agreed to the published version of the manuscript.

659 **Funding:** HJ receives support from the Wellcome Trust (4-Year PhD programme, grant number 215214/Z/19/Z).  
660 MK receives support from the Wellcome Trust (Sir Henry Wellcome Fellowship grant number 206508/Z/17/Z).  
661 RG, JH, SH, MJ, MK, TK, ML, SM, CCP, VW acknowledge funding for the EUCLIDS and PERFORM studies,  
662 funded by the European Union, grant numbers 668303 and 279185. JCB and AHT acknowledge the Marilyn and  
663 Gordon Macklin Foundation and the National Institutes of Health, Heart, Lung Blood Institute RO1HL140898.  
664 JH, ML and MK acknowledge support from the NIHR Imperial College BRC.

665 **Acknowledgments:** Many thanks to the patients and their families who took part in the studies that the data  
666 presented here originated from.

667 **Conflicts of Interest:** The authors declare no conflict of interest. The funders had no role in the design of the  
668 study; in the collection, analyses, or interpretation of data; in the writing of the manuscript, or in the decision to  
669 publish the results.

## 670 Abbreviations

|     |                          |
|-----|--------------------------|
| CAA | Coronary artery aneurysm |
| DB  | Definite bacterial       |
| DRS | Disease risk score       |
| DV  | Definite viral           |
| FDR | False discovery rate     |

|     |                                       |
|-----|---------------------------------------|
| HC  | Healthy control                       |
| KD  | Kawasaki Disease                      |
| LFC | Log-fold change                       |
| SDA | Significantly differentially abundant |

## 671 References

- 672 1. Kawasaki, T.; Kosaki, F.; Okawa, S.; Shigematsu, I.; Yanagawa, H. A New Infantile Acute Febrile  
673 Mucocutaneous Lymph Node Syndrome (MLNS) Prevailing in Japan. *Pediatrics* **1974**, *54*.
- 674 2. Ramphul, K.; Mejias, S.G. Kawasaki disease: a comprehensive review. *Arch. Med. Sci. - Atheroscler. Dis.*  
675 **2018**, *3*, 41–45, doi:10.5114/amsad.2018.74522.
- 676 3. Ogata, S.; Shimizu, C.; Franco, A.; Touma, R.; Kanegaye, J.T.; Choudhury, B.P.; Naidu, N.N.; Kanda, Y.;  
677 Hoang, L.T.; Hibberd, M.L.; et al. Treatment Response in Kawasaki Disease Is Associated with  
678 Sialylation Levels of Endogenous but Not Therapeutic Intravenous Immunoglobulin G. *PLoS One* **2013**,  
679 *8*, e81448, doi:10.1371/journal.pone.0081448.
- 680 4. Skochko, S.M.; Jain, S.; Sun, X.; Sivilyay, N.; Kanegaye, J.T.; Pancheri, J.; Shimizu, C.; Sheets, R.;  
681 Tremoulet, A.H.; Burns, J.C. Kawasaki Disease Outcomes and Response to Therapy in a Multiethnic  
682 Community: A 10-Year Experience. *J. Pediatr.* **2018**, *203*, 408–415.e3, doi:10.1016/j.jpeds.2018.07.090.
- 683 5. Brogan, P.; Burns, J.C.; Cornish, J.; Diwakar, V.; Eleftheriou, D.; Gordon, J.B.; Gray, H.H.; Johnson,  
684 T.W.; Levin, M.; Malik, I.; et al. Lifetime cardiovascular management of patients with previous  
685 Kawasaki disease. *Heart* **2020**, *106*, 411–420.
- 686 6. Singh, S.; Vignesh, P.; Burgner, D. The epidemiology of Kawasaki disease: A global update. *Arch. Dis.*  
687 *Child.* **2015**, *100*, 1084–1088.
- 688 7. Nagata, S. Causes of Kawasaki Disease—From Past to Present. *Front. Pediatr.* **2019**, *7*, 18,  
689 doi:10.3389/fped.2019.00018.
- 690 8. Dietz, S.M.; van Stijn, D.; Burgner, D.; Levin, M.; Kuipers, I.M.; Hutten, B.A.; Kuijpers, T.W. Dissecting  
691 Kawasaki disease: a state-of-the-art review. *Eur. J. Pediatr.* **2017**, *176*, 995–1009.
- 692 9. Nakamura, A.; Ikeda, K.; Hamaoka, K. Aetiological significance of infectious stimuli in Kawasaki  
693 disease. *Front. Pediatr.* **2019**, *7*, 244.
- 694 10. Rodó, X.; Ballester, J.; Cayan, D.; Melish, M.E.; Nakamura, Y.; Uehara, R.; Burns, J.C. Association of  
695 Kawasaki disease with tropospheric wind patterns. *Sci. Rep.* **2011**, *1*, doi:10.1038/srep00152.
- 696 11. Rypdal, M.; Rypdal, V.; Burney, J.A.; Cayan, D.; Bainto, E.; Skochko, S.; Tremoulet, A.H.; Creamean, J.;  
697 Shimizu, C.; Kim, J.; et al. Clustering and climate associations of Kawasaki Disease in San Diego  
698 County suggest environmental triggers. *Sci. Rep.* **2018**, *8*, 1–9, doi:10.1038/s41598-018-33124-4.
- 699 12. Levin, M. Childhood Multisystem Inflammatory Syndrome — A New Challenge in the Pandemic. *N.*  
700 *Engl. J. Med.* **2020**, *383*, 393–395, doi:10.1056/NEJMe2023158.
- 701 13. Whittaker, E.; Bamford, A.; Kenny, J.; Kaforou, M.; Jones, C.E.; Shah, P.; Ramnarayan, P.; Fraisse, A.;  
702 Miller, O.; Davies, P.; et al. Clinical Characteristics of 58 Children with a Pediatric Inflammatory  
703 Multisystem Syndrome Temporally Associated with SARS-CoV-2. *JAMA - J. Am. Med. Assoc.* **2020**, *324*,  
704 259–269, doi:10.1001/jama.2020.10369.
- 705 14. Dufort, E.M.; Koumans, E.H.; Chow, E.J.; Rosenthal, E.M.; Muse, A.; Rowlands, J.; Barranco, M.A.;  
706 Maxted, A.M.; Rosenberg, E.S.; Easton, D.; et al. Multisystem Inflammatory Syndrome in Children in  
707 New York State. *N. Engl. J. Med.* **2020**, *383*, 347–358, doi:10.1056/NEJMoa2021756.
- 708 15. McCrindle, B.W.; Manlhiot, C. SARS-CoV-2-Related Inflammatory Multisystem Syndrome in Children:  
709 Different or Shared Etiology and Pathophysiology as Kawasaki Disease? *JAMA - J. Am. Med. Assoc.*

- 710 2020, 324, 246–248.
- 711 16. Kaforou, M.; Wright, V.J.; Oni, T.; French, N.; Anderson, S.T.; Bangani, N.; Banwell, C.M.; Brent, A.J.;  
712 Crampin, A.C.; Dockrell, H.M.; et al. Detection of Tuberculosis in HIV-Infected and -Uninfected  
713 African Adults Using Whole Blood RNA Expression Signatures: A Case-Control Study. *PLoS Med.*  
714 **2013**, *10*, e1001538, doi:10.1371/journal.pmed.1001538.
- 715 17. Kaforou, M.; Herberg, J.A.; Wright, V.J.; Coin, L.J.M.; Levin, M. Diagnosis of Bacterial Infection Using a  
716 2-Transcript Host RNA Signature in Febrile Infants 60 Days or Younger. *JAMA* **2017**, *317*,  
717 doi:10.1001/jama.2017.1365.
- 718 18. Wright, V.J.; Herberg, J.A.; Kaforou, M.; Shimizu, C.; Eleftherohorinou, H.; Shailes, H.; Barendregt,  
719 A.M.; Menikou, S.; Gormley, S.; Berk, M.; et al. Diagnosis of Kawasaki Disease Using a Minimal  
720 Whole-Blood Gene Expression Signature. *JAMA Pediatr.* **2018**, *172*, e182293,  
721 doi:10.1001/jamapediatrics.2018.2293.
- 722 19. Hoang, L.T.; Shimizu, C.; Ling, L.; Naim, A.N.M.; Khor, C.C.; Tremoulet, A.H.; Wright, V.; Levin, M.;  
723 Hibberd, M.L.; Burns, J.C. Global gene expression profiling identifies new therapeutic targets in acute  
724 Kawasaki disease. *Genome Med.* **2014**, doi:10.1186/s13073-014-0102-6.
- 725 20. Gold, L.; Ayers, D.; Bertino, J.; Bock, C.; Bock, A.; Brody, E.N.; Carter, J.; Dalby, A.B.; Eaton, B.E.;  
726 Fitzwater, T.; et al. Aptamer-based multiplexed proteomic technology for biomarker discovery. *PLoS*  
727 *One* **2010**, doi:10.1371/journal.pone.0015004.
- 728 21. McCrindle, B.W.; Rowley, A.H.; Newburger, J.W.; Burns, J.C.; Bolger, A.F.; Gewitz, M.; Baker, A.L.;  
729 Jackson, M.A.; Takahashi, M.; Shah, P.B.; et al. Diagnosis, treatment, and long-term management of  
730 Kawasaki disease: A scientific statement for health professionals from the American Heart Association.  
731 *Circulation* **2017**, *135*, e927–e999, doi:10.1161/CIR.0000000000000484.
- 732 22. Herberg, J.A.; Kaforou, M.; Gormley, S.; Sumner, E.R.; Patel, S.; Jones, K.D.J.; Paulus, S.; Fink, C.;  
733 Martinon-Torres, F.; Montana, G.; et al. Transcriptomic profiling in childhood H1N1/09 influenza  
734 reveals reduced expression of protein synthesis genes. *J. Infect. Dis.* **2013**, *208*, 1664–1668,  
735 doi:10.1093/infdis/jit348.
- 736 23. Ritchie, M.E.; Phipson, B.; Wu, D.; Hu, Y.; Law, C.W.; Shi, W.; Smyth, G.K. limma powers differential  
737 expression analyses for RNA-sequencing and microarray studies. *Nucleic Acids Res.* **2015**, *43*, e47–e47,  
738 doi:10.1093/nar/gkv007.
- 739 24. Raudvere, U.; Kolberg, L.; Kuzmin, I.; Arak, T.; Adler, P.; Peterson, H.; Vilo, J. g:Profiler: a web server  
740 for functional enrichment analysis and conversions of gene lists (2019 update). *Nucleic Acids Res.* **2019**,  
741 *47*, W191–W198, doi:10.1093/nar/gkz369.
- 742 25. Newman, A.M.; Steen, C.B.; Liu, C.L.; Gentles, A.J.; Chaudhuri, A.A.; Scherer, F.; Khodadoust, M.S.;  
743 Esfahani, M.S.; Luca, B.A.; Steiner, D.; et al. Determining cell type abundance and expression from  
744 bulk tissues with digital cytometry. *Nat. Biotechnol.* **2019**, *37*, 773–782, doi:10.1038/s41587-019-0114-2.
- 745 26. Charrad, M.; Ghazzali, N.; Boiteau, V.; Niknafs, A. Nbclust: An R package for determining the relevant  
746 number of clusters in a data set. *J. Stat. Softw.* **2014**, doi:10.18637/jss.v061.i06.
- 747 27. Kimura, Y.; Yanagimachi, M.; Ino, Y.; Aketagawa, M.; Matsuo, M.; Okayama, A.; Shimizu, H.; Oba, K.;  
748 Morioka, I.; Imagawa, T.; et al. Identification of candidate diagnostic serum biomarkers for Kawasaki  
749 disease using proteomic analysis. *Sci. Rep.* **2017**, doi:10.1038/srep43732.
- 750 28. Whitin, J.C.; Yu, T.T.S.; Ling, X.B.; Kanegaye, J.T.; Burns, J.C.; Cohen, H.J. A novel truncated form of  
751 serum amyloid a in kawasaki disease. *PLoS One* **2016**, *11*, doi:10.1371/journal.pone.0157024.
- 752 29. Tibshirani, R. Regression Shrinkage and Selection via the Lasso. *J. R. Stat. Soc. Ser. B* **1996**, *58*, 267–288.

- 753 30. Danese, S. Nonimmune cells in inflammatory bowel disease: from victim to villain. *Trends Immunol.*  
754 2008, 29, 555–564.
- 755 31. Tanaka, K.; Yoshioka, T.; Bieberich, C.; Jay, G. Role of the Major Histocompatibility Complex Class I  
756 Antigens in Tumor Growth and Metastasis. *Annu. Rev. Immunol.* **1988**, 6, 359–380,  
757 doi:10.1146/annurev.iy.06.040188.002043.
- 758 32. Tremoulet, A.H.; Jain, S.; Chandrasekar, D.; Sun, X.; Sato, Y.; Burns, J.C. Evolution of laboratory values  
759 in patients with Kawasaki disease. *Pediatr. Infect. Dis. J.* **2011**, 30, 1022–1026,  
760 doi:10.1097/INF.0b013e31822d4f56.
- 761 33. Biezeveld, M.H.; van Mierlo, G.; Lutter, R.; Kuipers, I.M.; Dekker, T.; Hack, C.E.; Newburger, J.W.;  
762 Kuijpers, T.W. Sustained activation of neutrophils in the course of Kawasaki disease: an association  
763 with matrix metalloproteinases. *Clin. Exp. Immunol.* **2005**, 141, 183–188, doi:10.1111/j.1365-  
764 2249.2005.02829.x.
- 765 34. Asano, T.; Ogawa, S. Expression of IL-8 in Kawasaki disease. *Clin. Exp. Immunol.* **2000**, 122, 514–519,  
766 doi:10.1046/j.1365-2249.2000.01395.x.
- 767 35. Zandstra, J.; van de Geer, A.; Tanck, M.W.T.; van Stijn-Bringas Dimitriades, D.; Aarts, C.E.M.; Dietz,  
768 S.M.; van Bruggen, R.; Schweintzger, N.A.; Zenz, W.; Emonts, M.; et al. Biomarkers for the  
769 Discrimination of Acute Kawasaki Disease From Infections in Childhood. *Front. Pediatr.* **2020**, 8, 355,  
770 doi:10.3389/fped.2020.00355.
- 771 36. Manlhiot, C.; Mueller, B.; O’Shea, S.; Majeed, H.; Bernknopf, B.; Labelle, M.; Westcott, K. V.; Bai, H.;  
772 Chahal, N.; Birken, C.S.; et al. Environmental epidemiology of Kawasaki disease: Linking disease  
773 etiology, pathogenesis and global distribution. *PLoS One* **2018**, 13, doi:10.1371/journal.pone.0191087.
- 774 37. Rodó, X.; Curcoll, R.; Robinson, M.; Ballester, J.; Burns, J.C.; Cayan, D.R.; Lipkin, W.I.; Williams, B.L.;  
775 Couto-Rodriguez, M.; Nakamura, Y.; et al. Tropospheric winds from northeastern China carry the  
776 etiologic agent of Kawasaki disease from its source to Japan. *Proc. Natl. Acad. Sci. U. S. A.* **2014**, 111,  
777 7952–7957, doi:10.1073/pnas.1400380111.
- 778 38. Lu, X.; Zhang, L.; Du, H.; Zhang, J.; Li, Y.Y.; Qu, J.; Zhang, W.; Wang, Y.; Bao, S.; Li, Y.; et al. SARS-  
779 CoV-2 Infection in Children. *N. Engl. J. Med.* **2020**, 382, 1663–1665, doi:10.1056/NEJMc2005073.
- 780 39. Göttinger, F.; Santiago-García, B.; Noguera-Julián, A.; Lanaspa, M.; Lancellata, L.; Calò Carducci, F.I.;  
781 Gabrovská, N.; Velizarova, S.; Prunk, P.; Osterman, V.; et al. COVID-19 in children and adolescents in  
782 Europe: a multinational, multicentre cohort study. *Lancet Child Adolesc. Heal.* **2020**, 0, doi:10.1016/S2352-  
783 4642(20)30177-2.
- 784 40. Davies, P.; Evans, C.; Kanthimathinathan, H.K.; Lillie, J.; Brierley, J.; Waters, G.; Johnson, M.; Griffiths,  
785 B.; du Pré, P.; Mohammad, Z.; et al. Intensive care admissions of children with paediatric  
786 inflammatory multisystem syndrome temporally associated with SARS-CoV-2 (PIMS-TS) in the UK: a  
787 multicentre observational study. *Lancet Child Adolesc. Heal.* **2020**, 0, doi:10.1016/S2352-4642(20)30215-7.
- 788 41. Burgner, D.; Davila, S.; Breunis, W.B.; Ng, S.B.; Li, Y.; Bonnard, C.; Ling, L.; Wright, V.J.; Thalamuthu,  
789 A.; Odam, M.; et al. A genome-wide association study identifies novel and functionally related  
790 susceptibility Loci for Kawasaki disease. *PLoS Genet* **2009**, doi:10.1371/journal.pgen.1000319.
- 791 42. Curtis, N.; Zheng, R.; Lamb, J.R.; Levin, M. Evidence for a superantigen mediated process in Kawasaki  
792 disease. *Arch. Dis. Child.* **1995**, 72, 308–311, doi:10.1136/adc.72.4.308.
- 793 43. Han, S.B.; Lee, S.Y. Antibiotic use in children with Kawasaki disease. *World J. Pediatr.* **2018**, 14, 621–622.
- 794 44. Diz, A.P.; Martínez-Fernández, M.; Rolán-Alvarez, E. Proteomics in evolutionary ecology: Linking the  
795 genotype with the phenotype. *Mol. Ecol.* **2012**, 21, 1060–1080.

- 796 45. Benseler, S.M.; McCrindle, B.W.; Silverman, E.D.; Tyrrell, P.N.; Wong, J.; Yeung, R.S.M. Infections and  
797 Kawasaki disease: Implications for coronary artery outcome. *Pediatrics* **2005**, *116*, e760–e766,  
798 doi:10.1542/peds.2005-0559.
- 799 46. Martínón-Torres, F.; Salas, A.; Rivero-Calle, I.; Cebey-López, M.; Pardo-Seco, J.; Herberg, J.A.;  
800 Boeddha, N.P.; Klobassa, D.S.; Secka, F.; Paulus, S.; et al. Life-threatening infections in children in  
801 Europe (the EUCLIDS Project): a prospective cohort study. *Lancet Child Adolesc. Heal.* **2018**, *2*, 404–414,  
802 doi:10.1016/S2352-4642(18)30113-5.
- 803 47. Du, P.; Kibbe, W.A.; Lin, S.M. lumi: A pipeline for processing Illumina microarray. *Bioinformatics* **2008**,  
804 doi:10.1093/bioinformatics/btn224.
- 805 48. Leek, J.T.; Johnson, W.E.; Parker, H.S.; Jaffe, A.E.; Storey, J.D. The SVA package for removing batch  
806 effects and other unwanted variation in high-throughput experiments. *Bioinformatics* **2012**, *28*, 882–883,  
807 doi:10.1093/bioinformatics/bts034.
- 808 49. R Foundation for Statistical Computing R: A language and environment for statistical computing. *R A*  
809 *Lang. Environ. Stat. Comput.* **3.3.1** 2016.
- 810 50. Cox, J.; Mann, M. MaxQuant enables high peptide identification rates, individualized p.p.b.-range  
811 mass accuracies and proteome-wide protein quantification. *Nat. Biotechnol.* **2008**, *26*, 1367–1372,  
812 doi:10.1038/nbt.1511.
- 813 51. Cox, J.; Hein, M.Y.; Luber, C.A.; Paron, I.; Nagaraj, N.; Mann, M. Accurate proteome-wide label-free  
814 quantification by delayed normalization and maximal peptide ratio extraction, termed MaxLFQ. *Mol.*  
815 *Cell. Proteomics* **2014**, *13*, 2513–2526, doi:10.1074/mcp.M113.031591.
- 816 52. Sweeney, T.E. COCONUT: COmbat CO-Normalization Using conTrols (COCONUT). R package  
817 version 1.0.2. **2017**.
- 818 53. Benjamini, Y.; Hochberg, Y. Controlling the False Discovery Rate: A Practical and Powerful Approach  
819 to Multiple Testing. *J. R. Stat. Soc. Ser. B* **1995**, *57*, 289–300.
- 820 54. Supek, F.; Bošnjak, M.; Škunca, N.; Šmuc, T. REVIGO Summarizes and Visualizes Long Lists of Gene  
821 Ontology Terms. *PLoS One* **2011**, *6*, e21800, doi:10.1371/journal.pone.0021800.
- 822 55. Hartigan, J.A.; Wong, M.A. Algorithm AS 136: A K-Means Clustering Algorithm. *Appl. Stat.* **1979**, *28*,  
823 100, doi:10.2307/2346830.
- 824 56. Krzanowski, W.J.; Lai, Y.T. A Criterion for Determining the Number of Groups in a Data Set Using  
825 Sum-of-Squares Clustering. *Biometrics* **1988**, *44*, 23, doi:10.2307/2531893.
- 826 57. Caliński, T.; Harabasz, J. A Dendrite Method For Cluster Analysis. *Commun. Stat.* **1974**, *3*, 1–27,  
827 doi:10.1080/03610927408827101.
- 828 58. Gordon, A.D.; Hartigan, J.A. Clustering Algorithms. *J. Am. Stat. Assoc.* **1976**, doi:10.2307/2286880.
- 829 59. McClain, J.O.; Rao, V.R. CLUSTISZ: A Program to Test for the Quality of Clustering of a Set of Objects.  
830 *J. Mark. Res.* **12**, 456–460.
- 831 60. Dunn, J.C. Well-separated clusters and optimal fuzzy partitions. *J. Cybern.* **1974**, *4*, 95–104,  
832 doi:10.1080/01969727408546059.
- 833 61. Halkidi, M.; Vazirgiannis, M.; Balisalakos, V. Quality scheme assessment in the clustering process. In  
834 Proceedings of the Lecture Notes in Computer Science (including subseries Lecture Notes in Artificial  
835 Intelligence and Lecture Notes in Bioinformatics); Springer Verlag, 2000; Vol. 1910, pp. 265–276.
- 836 62. Halkidi, M.; Vazirgiannis, M. Clustering validity assessment: Finding the optimal partitioning of a data  
837 set. In Proceedings of the Proceedings - IEEE International Conference on Data Mining, ICDM; 2001;  
838 pp. 187–194.



- 839 63. Hubert, L.J.; Levin, J.R. A general statistical framework for assessing categorical clustering in free  
840 recall. *Psychol. Bull.* **1976**, *83*, 1072–1080, doi:10.1037/0033-2909.83.6.1072.
- 841 64. Rousseeuw, P.J. Silhouettes: A graphical aid to the interpretation and validation of cluster analysis. *J.*  
842 *Comput. Appl. Math.* **1987**, *20*, 53–65, doi:10.1016/0377-0427(87)90125-7.
- 843 65. Ball, G.H.; Hall, D.J. ISODATA, A NOVEL METHOD OF DATA ANALYSIS AND PATTERN  
844 CLASSIFICATION. *undefined* **1965**.
- 845 66. Milligan, G.W. An examination of the effect of six types of error perturbation on fifteen clustering  
846 algorithms. *Psychometrika* **1980**, *45*, 325–342, doi:10.1007/BF02293907.
- 847 67. Milligan, G.W. A monte carlo study of thirty internal criterion measures for cluster analysis.  
848 *Psychometrika* **1981**, *46*, 187–199, doi:10.1007/BF02293899.
- 849 68. Ratkowsky, D.; Lance, G. A Criterion for Determining the Number of Groups in a Classification. *Aust.*  
850 *Comput. J.* **1978**, *10*, 115–117.
- 851 69. Robin, X.; Turck, N.; Hainard, A.; Tiberti, N.; Lisacek, F.; Sanchez, J.C.; Müller, M. pROC: An open-  
852 source package for R and S+ to analyze and compare ROC curves. *BMC Bioinformatics* **2011**, *12*, 77,  
853 doi:10.1186/1471-2105-12-77.
- 854

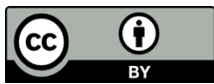

© 2020 by the authors. Submitted for possible open access publication under the terms and conditions of the Creative Commons Attribution (CC BY) license (<http://creativecommons.org/licenses/by/4.0/>).

855
